# Supplementary material
Source: PubMed Central journal article supplement (PMC8324260)
Supplement: 1392.pdf [file 1392.pdf]

Appendix:

Table A1: Histological Composition

| Composition Ratio's                        | MSB Histological Stain |                   |        |                     | Immunohistochemistry |        |        |        |
|--------------------------------------------|------------------------|-------------------|--------|---------------------|----------------------|--------|--------|--------|
|                                            | Red Blood Cells        | White Blood Cells | Fibrin | Platelets and Other | CD42b                | Tissue | vWF    | Tissue |
| <b>RBC+Buffy Coat : Plasma Only</b>        |                        |                   |        |                     |                      |        |        |        |
| <b>1:5</b>                                 | 78.84%                 | 0.33%             | 7.61%  | 13.22%              | 2.64%                | 97.36% | 1.81%  | 98.19% |
| <b>1:10</b>                                | 78.02%                 | 0.07%             | 13.16% | 8.74%               | 1.44%                | 98.56% | 1.05%  | 98.95% |
| <b>1:50</b>                                | 28.67%                 | 0.15%             | 42.55% | 28.63%              | 0.46%                | 99.54% | 3.27%  | 96.73% |
| <b>1:100</b>                               | 19.61%                 | 0.04%             | 45.73% | 34.62%              | 3.03%                | 96.97% | 1.18%  | 98.82% |
| <b>RBC+Buffy Coat : Platelets Only</b>     |                        |                   |        |                     |                      |        |        |        |
| <b>1:5</b>                                 | 59.22%                 | 1.05%             | 12.59% | 27.15%              | 30.44%               | 69.56% | 19.26% | 80.74% |
| <b>1:10</b>                                | 30.09%                 | 0.91%             | 4.17%  | 64.83%              | 47.11%               | 52.89% | 63.43% | 36.57% |
| <b>1:50</b>                                | 15.33%                 | 0.03%             | 5.87%  | 78.77%              | 19.30%               | 80.70% | 17.44% | 82.56% |
| <b>1:100</b>                               | 12.01%                 | 0.03%             | 4.29%  | 83.66%              | 25.35%               | 74.65% | 34.65% | 65.35% |
| <b>RBC+Buffy Coat : Platelets + Plasma</b> |                        |                   |        |                     |                      |        |        |        |
| <b>1:5</b>                                 | 91.42%                 | 0.06%             | 3.11%  | 5.41%               | 22.73%               | 77.27% | 3.49%  | 96.51% |
| <b>1:10</b>                                | 77.13%                 | 0.19%             | 13.17% | 9.51%               | 12.31%               | 87.69% | 15.47% | 84.53% |
| <b>1:50</b>                                | 50.51%                 | 0.01%             | 19.45% | 30.03%              | 12.01%               | 87.99% | 10.81% | 89.19% |
| <b>1:100</b>                               | 8.90%                  | 0.06%             | 53.39% | 37.64%              | 11.72%               | 88.28% | 2.25%  | 97.75% |

**Table A2: Raw result of revascularization in the benchtop thrombectomy testing platform.**

| Clot           | Direct Aspiration (DA) |        |        |        |     | Stentriever + Aspiration (STR+A) |        |        |     |
|----------------|------------------------|--------|--------|--------|-----|----------------------------------|--------|--------|-----|
|                | Ingestion?             | Pass 1 | Pass 2 | Pass 3 | DE? | Pass 1                           | Pass 2 | Pass 3 | DE? |
| <b>Soft</b>    |                        |        |        |        |     |                                  |        |        |     |
| #1             | Yes                    | SR     |        |        | No  | SR                               |        |        | No  |
| #2             | Yes                    | SR     |        |        | No  | SR                               |        |        | No  |
| #3             | Yes                    | SR     |        |        | No  | SR                               |        |        | No  |
| #4             | Yes                    | SR     |        |        | No  | SR                               |        |        | No  |
| #5             | No                     | SR     |        |        | No  | SR                               |        |        | No  |
| <b>Elastic</b> |                        |        |        |        |     |                                  |        |        |     |
| #1             | Yes                    | SR     |        |        | No  | Fail                             | Fail   | SR     | Yes |
| #2             | Yes                    | SR     |        |        | No  | SR                               |        |        | No  |
| #3             | No                     | SR     |        |        | Yes | Fail                             | SR     |        | Yes |
| #4             | No                     | SR     |        |        | No  | Fail                             | SR     |        | Yes |
| #5             | No                     | SR     |        |        | No  | SR                               |        |        | No  |
| <b>Stiff</b>   |                        |        |        |        |     |                                  |        |        |     |
| #1             | Yes                    | SR     |        |        | No  | Fail                             | Fail   | Fail   | Yes |
| #2             | No                     | Fail   | Fail   | Fail   | Yes | Fail                             | SR     |        | Yes |
| #3             | No                     | SR     |        |        | Yes | SR                               |        |        | No  |
| #4             | No                     | Fail   | Fail   | Fail   | Yes | SR                               |        |        | No  |
| #5             | No                     | Fail   | Fail   | Fail   | Yes | SR                               |        |        | No  |

SR: Successful Revascularization; Fail: Failed Revascularization; DE: Distal Embolization
